# Supplementary material for: Limited effects of different real groundwaters from three coastal cities in China on the transport of low-concentration nanoplastics in quartz sand
Source: Royal Society of Chemistry journal article supplement (doi:10.1039/d3em00388d), 2023-01-01
Supplement: d3em00388d1.pdf [file d3em00388d1.pdf]

## **Supplementary Information**

### **Limited effects of different real groundwaters from three coastal cities in China on the transport of low-concentration nanoplastics in quartz sand**

**Yanan Liu<sup>a</sup>, Genyao Gu<sup>a</sup>, Guoqing Li<sup>a</sup>, Hyunjung Kim<sup>b</sup>, Li Cai<sup>a,\*</sup>, Huiwen Cai<sup>c,\*</sup>**

**<sup>a</sup> College of Environmental Science and Engineering, Donghua University, Shanghai 201620, P. R. China**

**<sup>b</sup> Department of Earth Resources and Environmental Engineering, Hanyang University, 222 Wangsimni-ro, Seongdong-gu, Seoul 04763, Republic of Korea**

**<sup>c</sup> Takuvik, CNRS/Université Laval, IRL3376, 1045 avenue de la, Médecine Quebec QC, G1V0A6, Canada**

**\*Corresponding author. E-mail: caili@dhu.edu.cn (Cai L.); E-mail: huiwen.cai93@gmail.com (Cai H. W.).**

Number of Pages: 11

Number of Tables: 2

Number of Figures: 3

## 1   **Text S1. NPs concentration determination**

2       The concentration of both PS and PLGA NPs were analyzed using a fluorescence  
3   spectrophotometer (F7000, Hitachi, Japan) with 10 mm × 10 mm quartz cuvette. The  
4   optimum excitation/emission wavelengths to detect the PS NPs (both 0.51 and 1.1 μm)  
5   and PLGA NPs were determined to be 468/508 nm and 460/500 nm, respectively, and  
6   the excitation and emission slits of the instrument were both set at 5 nm. The calibration  
7   results confirmed a linear correlation between the NPs concentration and the intensity  
8   of the fluorescence signals over the range of the investigated NPs concentrations (Fig.  
9   S2). To testify the influence of real groundwaters on the detection of NP using  
10   fluorescence spectrophotometer, NPs suspension diluted with both DI water and real  
11   groundwater samples (ZJ site) at the same concentration were prepared. Then, the  
12   concentrations of samples were determined by fluorescence spectrophotometer, and the  
13   results were presented in Fig. S3. It was observed that the detected concentration of  
14   NPs were equal in DI waters and groundwater, indicating the negligible influence of  
15   real groundwaters on the detection of NPs using fluorescence spectrophotometer.

16

## 17   **Text S2. Column experiments protocol**

18       Ultrapure quartz sand (Minghai Quartz Sand Factory, Zhengzhou, China) with  
19   sizes ranging from 417 to 600 μm was as porous media for the NPs transport  
20   experiments. The quartz sand was cleaned by soaking in concentrated HCl for at least  
21   24 hours, and then in 1 M NaOH solution for another 24 hours. After acid-washing and

alkali-washing, the quartz sand was washed with DI water repeatedly to bring the pH to neutral. Then the quartz sand was dried at 105 °C overnight, and then baking overnight at 850 °C for at least 8 h.

Prior to packing, the cleaned quartz sand was rehydrated by boiling in DI water for at least 0.5 h. After the rehydrated quartz sand was cooled, the columns were packed by adding wet quartz sand in small increments (~ 1 cm) with mild vibration of the column to minimize any layering or air entrapment. One 80 mesh fabric screen was placed at each end of the column.

### **Text S3. Calculation of interaction energies between NPs-NPs and NPs-sand**

The Derjaguin-Landau-Verwey-Overbeek (DLVO) theory was used to calculate the interaction energies ( $V_{TOT}$ ), a sum of van der Waals ( $V_{VDW}$ ) and electrostatic double layer ( $V_{EDL}$ ) interactions, between NPs and NPs (sphere to sphere).

$$V_{TOT} = V_{VDW} + V_{EDL}$$

The van der Waals interaction is calculated by <sup>1</sup>

$$V_{VDW} = - \frac{Aa}{12h}$$

where A is the Hamaker constant for NPs ( $1.0 \times 10^{-20}$  J for PS <sup>2, 3</sup> and  $6.0 \times 10^{-21}$  J for PLGA <sup>4</sup>), a is the radius of NPs (m), and h is the separation distance between NPs and NPs (m).

The electronics double layer interaction is calculated by

$$V_{EDL} = 32\pi a \left( \frac{k_B T}{ze} \right)^2 \gamma^2 e^{(-\kappa h)}$$

43 where  $k_B$  is Boltzmann constant ( $1.38 \times 10^{-23}$  J/K),  $T$  is the Kelvin temperature (298 K),  
 44  $z$  is the indifferent ion valence (treated as 1 in this study),  $e$  is the elementary charge  
 45 ( $1.6 \times 10^{-19}$  C), and  $\kappa$  is the Debye length ( $\text{m}^{-1}$ ), defined as

$$46 \quad k = \sqrt{\frac{2N_A e^2 I}{\epsilon_r \epsilon_0 k_B T}}$$

47 and  $\gamma$  is a dimensionless function of the surface potential, defined as

$$48 \quad \gamma = \tanh \left( \frac{ze\varphi}{4k_B T} \right)$$

49 where  $N_A$  is Avogadro's number ( $6.02 \times 10^{23}$  mol<sup>-1</sup>),  $I$  is the ionic strength of the real  
 50 groundwaters (converted from the conductivities of the real groundwaters, 12.88  
 51 mS/cm treated as 0.1 mM IS),  $\epsilon_0$  is the permittivity in vacuum ( $8.85 \times 10^{-12}$  C<sup>2</sup>/J m),  $\epsilon_r$   
 52 is the relative dielectric permittivity of water (78.4), and  $\varphi$  is the surface charge,  
 53 approximated by the zeta-potentials of NPs.

54 We used the extended DLVO (XDLVO) theory to calculate the interaction  
 55 energies ( $V'_{\text{TOT}}$ ) between NPs and sand (sphere to plate). It includes  $V'_{\text{VDW}}$ ,  $V'_{\text{EDL}}$ , and  
 56 Lewis acid-base ( $V_{\text{AB}}$ ) interaction. The van der Waals interaction is calculated by

$$57 \quad V'_{\text{VDW}} = - \frac{Ar}{6h \left( 1 + \frac{14h}{\lambda} \right)}$$

58 where  $h$  is the separation distance between NPs and sand, and  $\lambda$  is the characteristic  
 59 wavelength (42.5 nm) <sup>5</sup>.

60 The electrostatic double layer interaction is calculated by

$$61 \quad V_{\text{EDL}} = \pi r \epsilon_0 \epsilon_r \left\{ 2\phi_1 \phi_2 \ln \left[ \frac{1 + \exp(-kh)}{1 - \exp(-kh)} \right] + (\phi_1^2 + \phi_2^2) \ln [1 - \exp(-2kh)] \right\}$$

62 where  $\phi_1$  and  $\phi_2$  are the surface potentials of NPs and sand, respectively.

63 The Lewis acid-base ( $V_{AB}$ ) interaction energy is calculated by

$$64 \quad V_{AB} = 2\pi r \lambda_w \Delta G_{h_0}^{AB} \exp \left( \frac{h_0 - h}{\lambda_w} \right)$$

65 where  $\lambda_w$  is the characteristic decay length (0.6 nm) of acid-base interactions in water

66 <sup>6</sup>,  $h_0$  is the minimum equilibrium distance (0.157 nm) between NPs and sand surface <sup>6</sup>,

67 and  $\Delta G_{h_0}^{AB}$  can be calculated as:

$$68 \quad \Delta G_{h_0}^{AB} = 2 \left[ \sqrt{\gamma_w^+} (\sqrt{\gamma_m^-} + \sqrt{\gamma_s^-} - \sqrt{\gamma_w^-}) + \sqrt{\gamma_w^-} (\sqrt{\gamma_m^+} + \sqrt{\gamma_s^+} - \sqrt{\gamma_w^+}) - \sqrt{\gamma_m^- \gamma_s^+} - \sqrt{\gamma_m^+ \gamma_s^-} \right]$$

69 where the subscripts  $m$ ,  $w$  and  $s$  represent NPs, water and sand, respectively, electron

70  $\Upsilon^+$  ( $\Upsilon^-$ ) is the electronics accepting (donating) interfacial tension ( $\gamma_w^+ = \gamma_w^- = 25.5$

71 mJ/m<sup>2</sup>,  $\gamma_s^+ = 1.4$  mJ/m<sup>2</sup>,  $\gamma_s^- = 47.8$  mJ/m<sup>2</sup>,  $\gamma_m^+ = 0.02$  mJ/m<sup>2</sup>, and  $\gamma_m^- = 7.6$  mJ/m<sup>2</sup>) <sup>7</sup>,

72 <sup>8</sup>.

73 **Table S1.** Breakthrough mass recovery of column experiments.

| <b>NPs</b>                               | <b>Site</b> | <b>Breakthrough mass recovery (%)</b> |
|------------------------------------------|-------------|---------------------------------------|
| <b>PS, 0.51 <math>\mu\text{m}</math></b> | FJ          | 91.21 $\pm$ 1.08                      |
|                                          | ZJ          | 91.67 $\pm$ 3.71                      |
|                                          | JS          | 80.07 $\pm$ 1.60                      |
| <b>PS, 1.1 <math>\mu\text{m}</math></b>  | FJ          | 87.66 $\pm$ 1.61                      |
|                                          | ZJ          | 88.60 $\pm$ 1.69                      |
|                                          | JS          | 90.30 $\pm$ 0.96                      |
| <b>PLGA, 1 <math>\mu\text{m}</math></b>  | FJ          | 22.62 $\pm$ 0.52                      |
|                                          | ZJ          | 27.80 $\pm$ 3.26                      |
|                                          | JS          | 31.15 $\pm$ 0.20                      |

75 **Table S2.** Zeta potentials of NPs and quartz sand, and average sizes of NPs with  
76 different real groundwaters.

| <b>NPs and sand</b>                      | <b>Site</b> | <b>Zeta potential<br/>(mV)</b> | <b>Average size<br/>(nm)</b> |
|------------------------------------------|-------------|--------------------------------|------------------------------|
| <b>PS, 0.51 <math>\mu\text{m}</math></b> | FJ          | -41.32 $\pm$ 2.35              | 771.40 $\pm$ 39.99           |
|                                          | ZJ          | -16.88 $\pm$ 1.95              | 635.85 $\pm$ 3.18            |
|                                          | JS          | -19.93 $\pm$ 0.92              | 670.87 $\pm$ 14.21           |
| <b>PS, 1.1 <math>\mu\text{m}</math></b>  | FJ          | -34.27 $\pm$ 0.58              | 3220.32 $\pm$ 96.28          |
|                                          | ZJ          | -13.96 $\pm$ 0.27              | 1119.26 $\pm$ 13.34          |
|                                          | JS          | -15.5 $\pm$ 0.59               | 1205.91 $\pm$ 73.16          |
| <b>PLGA, 1 <math>\mu\text{m}</math></b>  | FJ          | -8.06 $\pm$ 1.65               | 18168.64 $\pm$ 1072.73       |
|                                          | ZJ          | -11.03 $\pm$ 1.96              | 24716.84 $\pm$ 3042.68       |
|                                          | JS          | -5.31 $\pm$ 2.20               | 24819.29 $\pm$ 4189.81       |
| <b>Quartz sand</b>                       | FJ          | -25.52 $\pm$ 0.37              | NA                           |
|                                          | ZJ          | -13.69 $\pm$ 1.95              |                              |
|                                          | JS          | -17.51 $\pm$ 0.43              |                              |

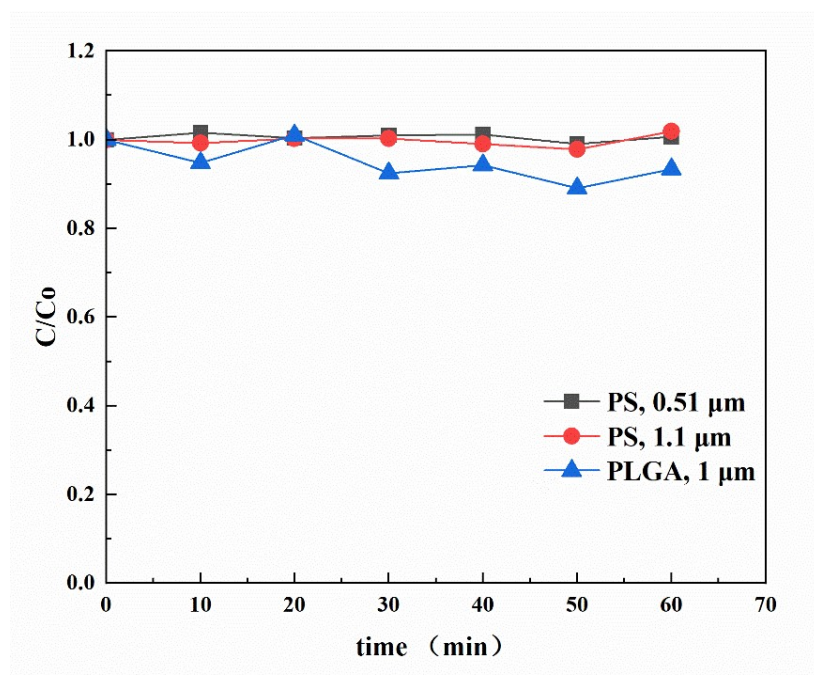

78

79 **Fig. S1.** The stability of both PS and PLGA NPs in DI water.



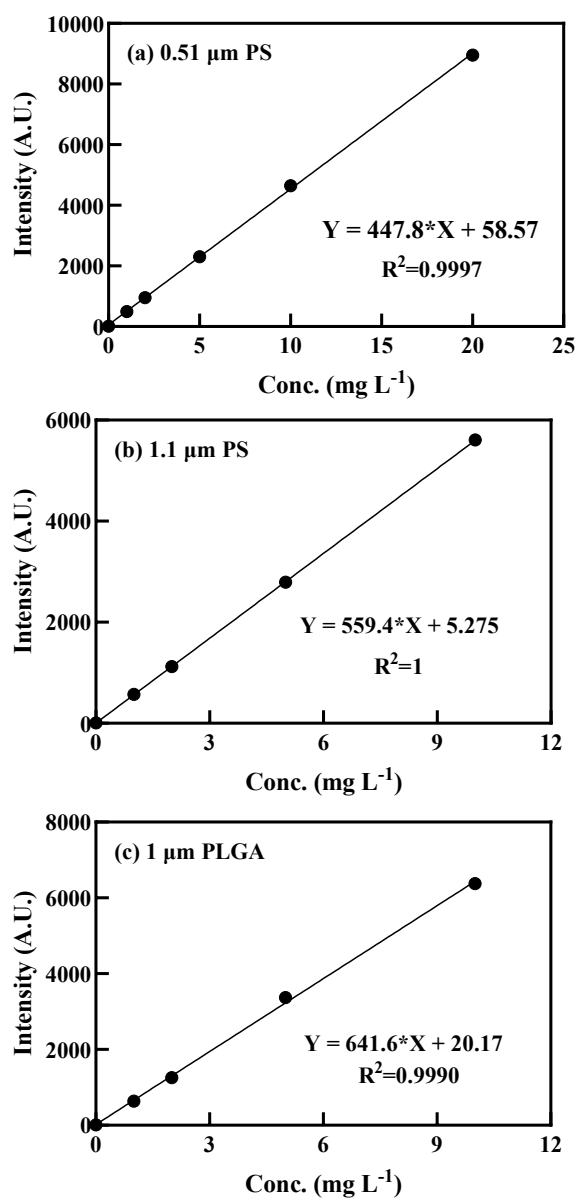

80

81 **Fig. S2.** Calibration curves of PS and PLGA NPs with fluorescence spectrophotometer.

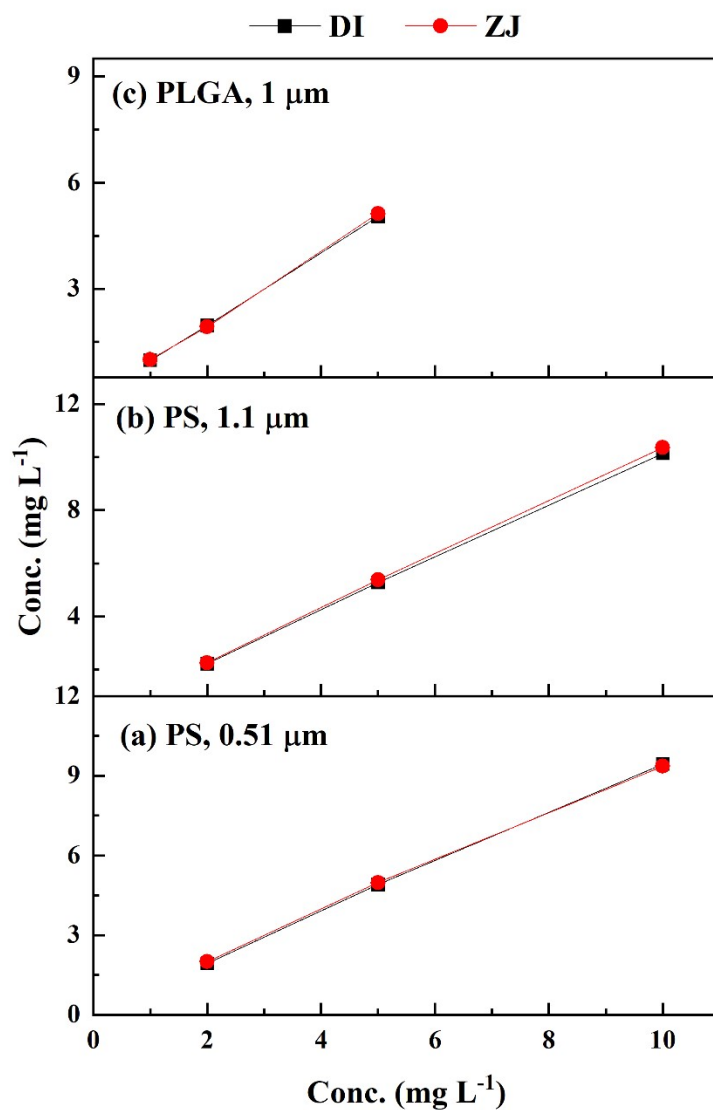

82

83 **Fig. S3.** Influence of groundwater on the detection of NPs using fluorescence  
 84 spectrophotometer.

86 **References**

- 87 1. M. Elimelech, J. Gregory, X. Jia and R. A. F. Williams, *Particle Deposition and*  
88 *Aggregation*, 1995.
- 89 2. K. Gotoh, R. Kohsaka, K. Abe and M. Tagawa, Estimation of the Hamaker  
90 constant from flocculation in the secondary minimum and its experimental  
91 verification in particle adhesion, *J. Adhes. Sci. Technol.*, 1996, 10, 1359-1370.
- 92 3. M. B. Seymour, G. Chen, C. Su and Y. Li, Transport and retention of colloids in  
93 porous media: Does shape really matter?, *Environ. Sci. Technol.*, 2013, 47, 8391-  
94 8398.
- 95 4. J. Fei, H. Xie, Y. Zhao, X. Zhou, H. Sun, N. Wang, J. Wang and X. Yin, Transport  
96 of degradable/nondegradable and aged microplastics in porous media: Effects of  
97 physicochemical factors, *Sci. Total Environ.*, 2022, 851, 158099.
- 98 5. L. Suresh and J. Y. Walz, Effect of Surface Roughness on the interaction energy  
99 between a colloidal sphere and a flat plate, *J. Colloid. Interf. Sci.*, 1996, 183, 199-  
100 213.
- 101 6. T. Xia, J. D. Fortner, D. Zhu, Z. Qi and W. Chen, Transport of sulfide-reduced  
102 graphene oxide in saturated quartz sand: Cation-dependent retention mechanisms,  
103 *Environ. Sci. Technol.*, 2015, 49, 11468-11475.
- 104 7. A. M. Gallardo-Moreno, M. L. Gonzalez-Martin, C. Perez-Giraldo, E. Garduno, J.  
105 M. Bruque and A. C. Gomez-Garcia, Thermodynamic analysis of growth  
106 temperature dependence in the adhesion of *Candida parapsilosis* to polystyrene,  
107 *Appl. Environ. Microb.*, 2002, 68, 2610-2613.
- 108 8. Y. Sun, B. Gao, S. A. Bradford, L. Wu, H. Chen, X. Shi and J. Wu, Transport,  
109 retention, and size perturbation of graphene oxide in saturated porous media:  
110 effects of input concentration and grain size, *Water Res.*, 2015, 68, 24-33.
